# Supplementary material for: Fish and Chips: a microfluidic perfusion platform for monitoring zebrafish development
Source: Royal Society of Chemistry journal article supplement (doi:10.1039/c1lc20351g), 2011-12-07
Supplement: c1lc20351g.pdf [file c1lc20351g.pdf]

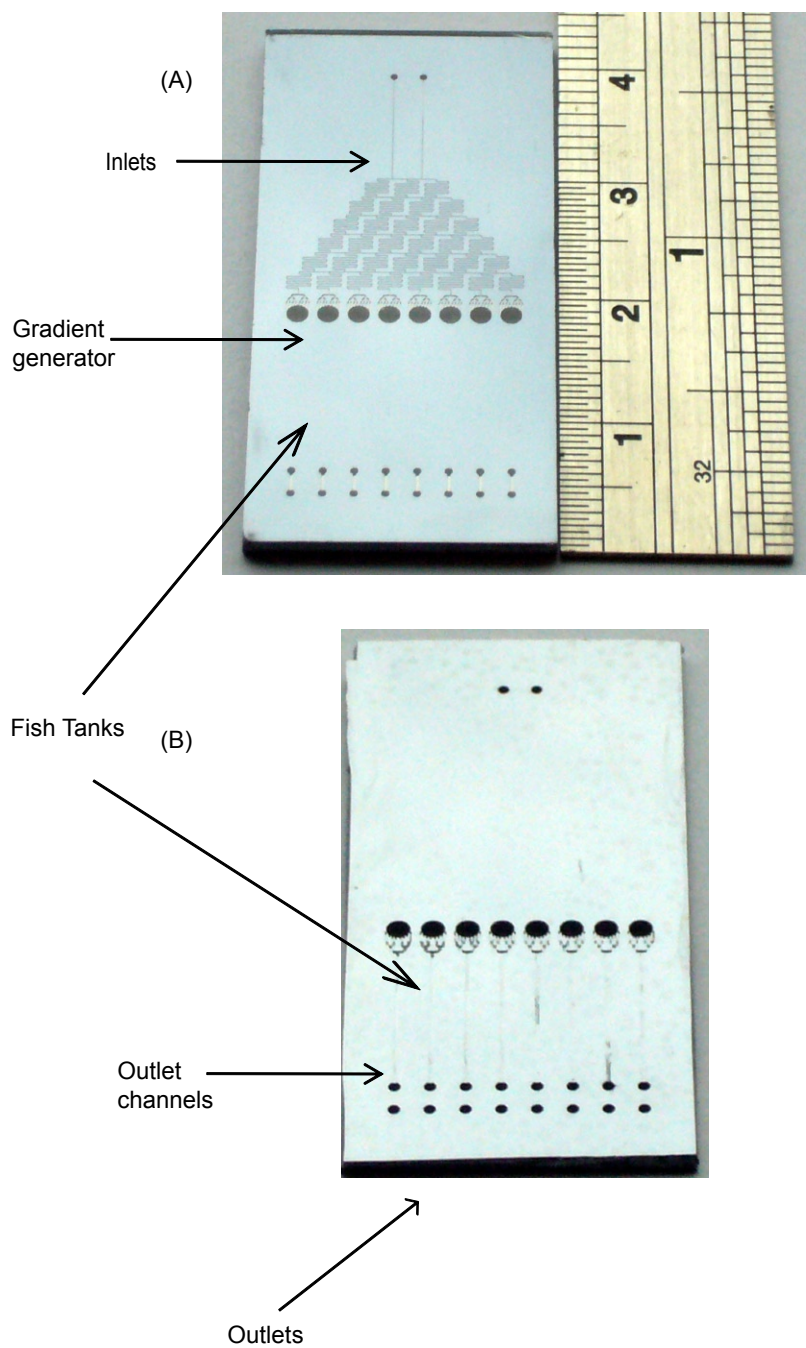

Supplementary 1: Fabricated chips: The top (B) and bottom (A) views of the chip are shown here with etched inlets, gradient generator, outlet channels and outlets
